# Supplementary material
Source: PubMed Central journal article supplement (PMC4087167)

Figure S1

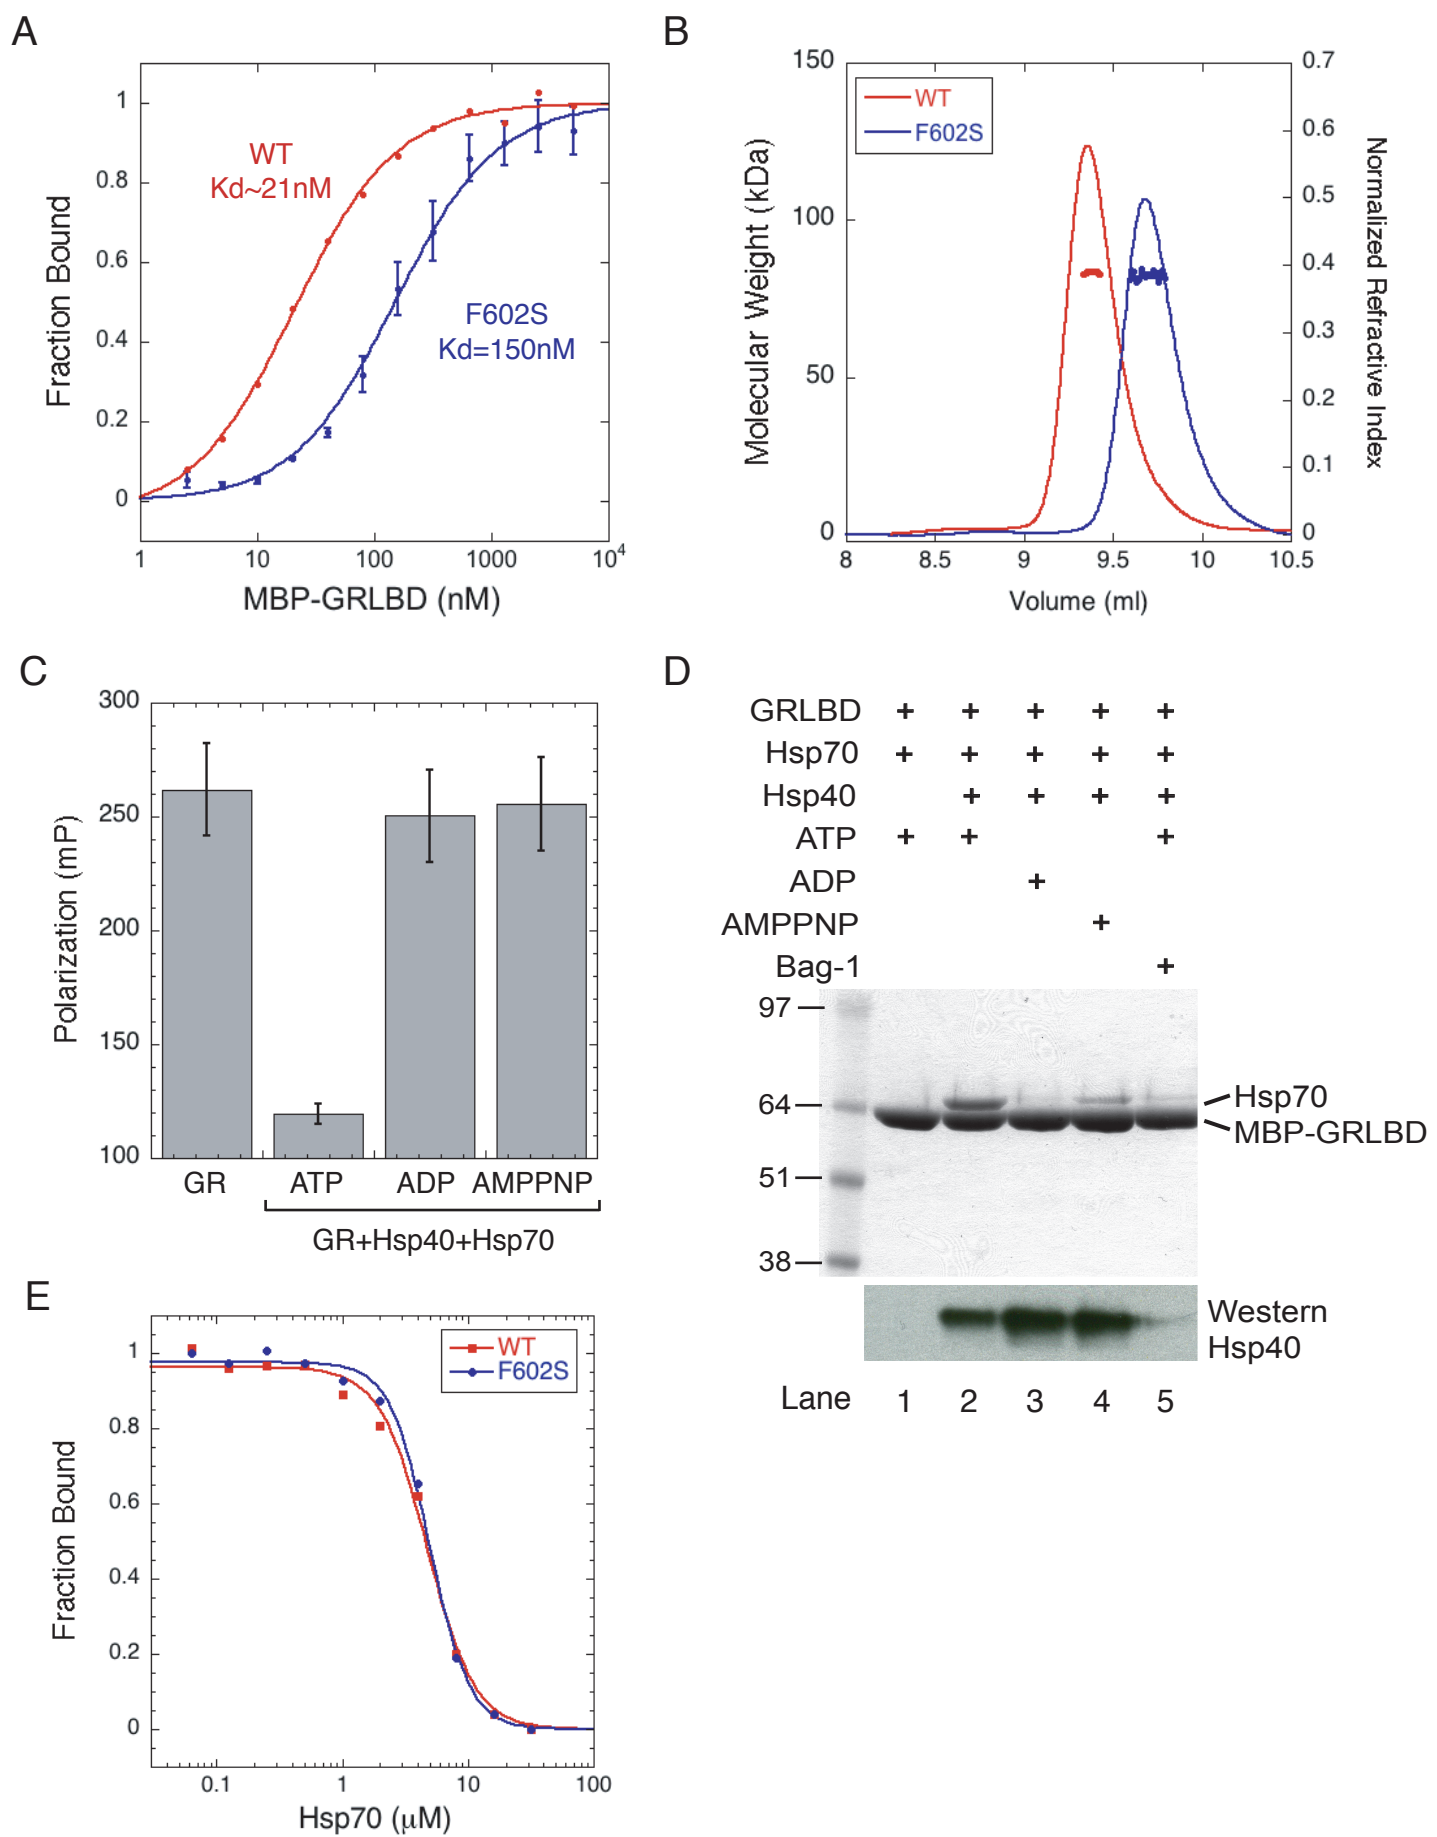

Figure S2

A

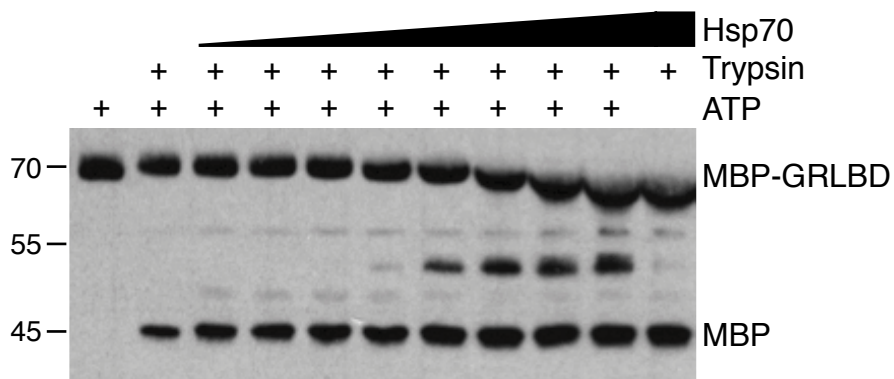

B

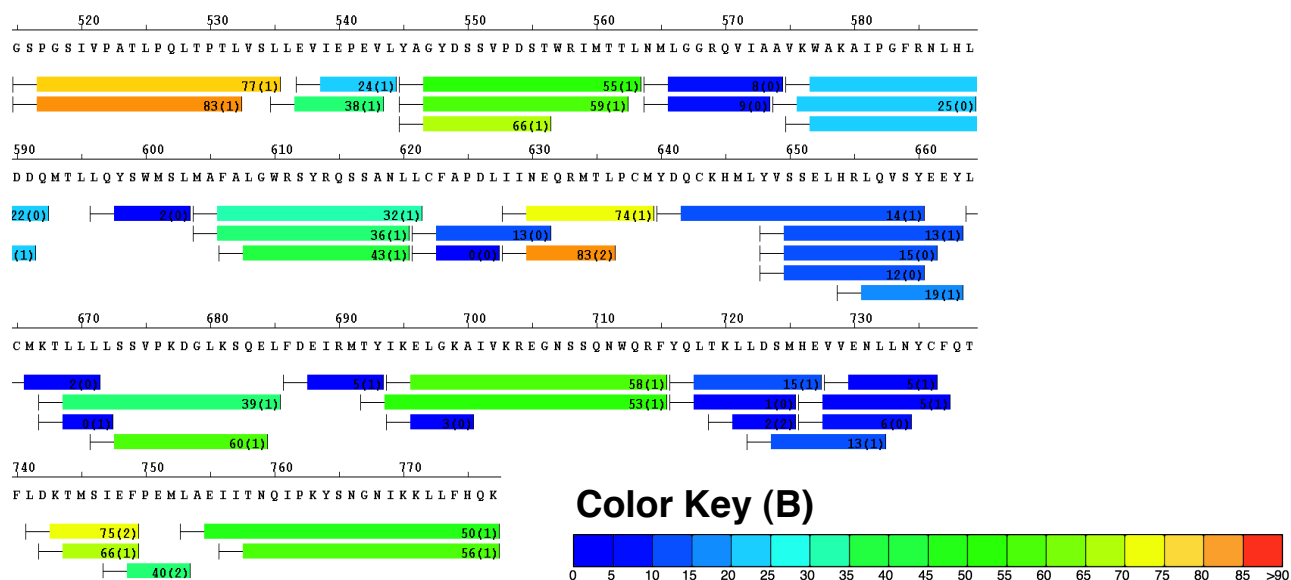

C

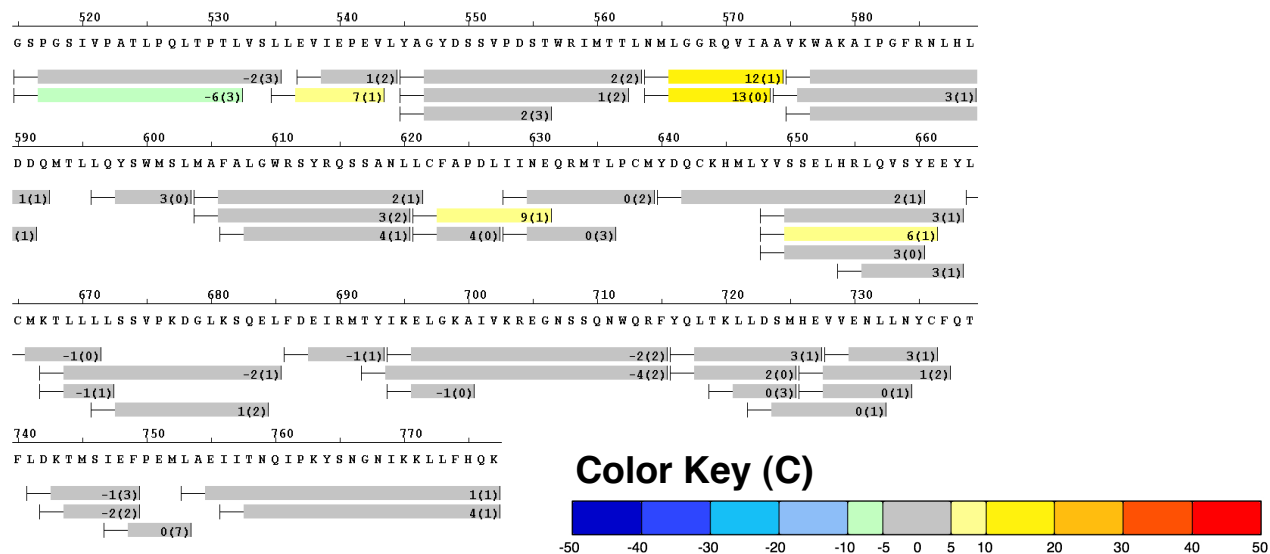

Figure S3

|              |   |   |   |   |   |   |   |   |   |   |
|--------------|---|---|---|---|---|---|---|---|---|---|
| GRLBD        | + | + | + | + | + | + | + | + | + | + |
| Hsp40        |   | + | + | + | + | + | + | + | + | + |
| Hsp70        |   | + | + | + | + | + | + | + | + | + |
| Hsp90 WT     | + |   | + | + | + | + | + |   |   | + |
| Hsp90 (E47A) |   |   |   |   |   |   |   | + |   |   |
| Hsp90 (D93N) |   |   |   |   |   |   |   |   | + |   |
| HOP          | + |   |   | + |   | + | + | + | + | + |
| p23          | + |   |   |   | + | + | + | + | + | + |
| Bag-1        |   |   |   |   |   |   |   |   |   | + |
| 17AAG        |   |   |   |   |   |   | + |   |   |   |

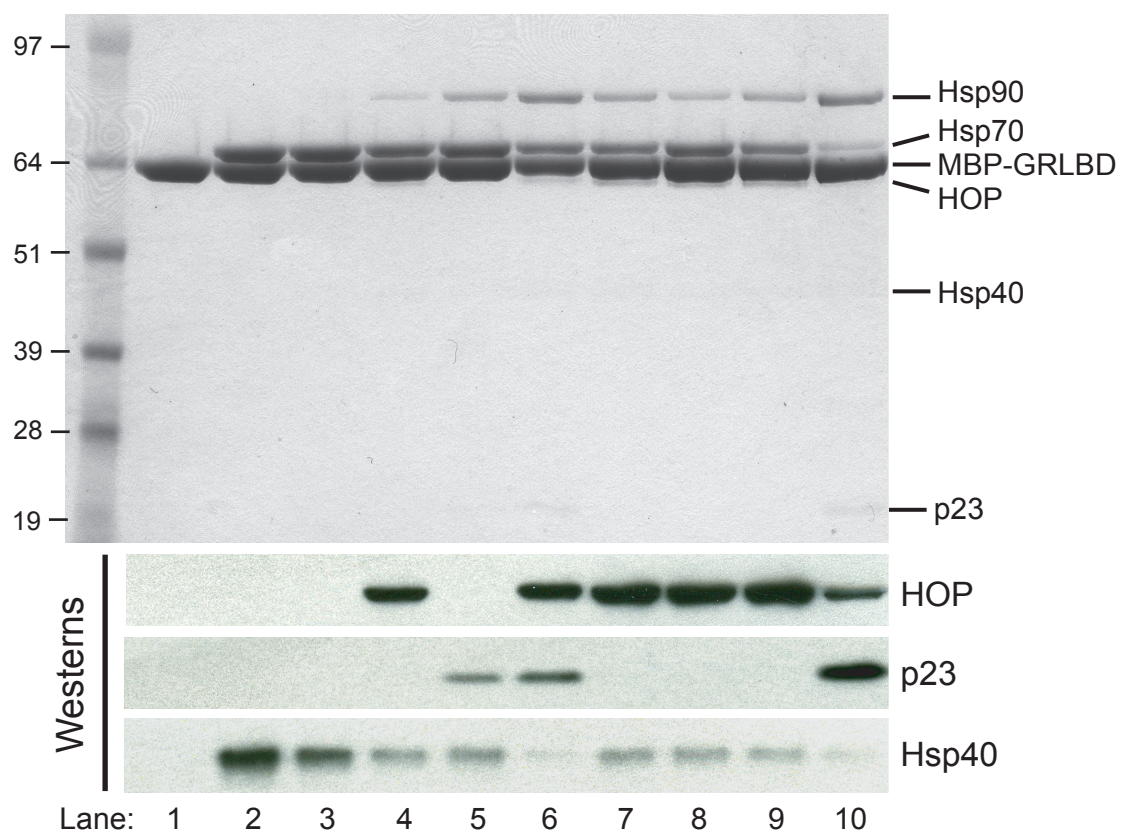

Figure S4

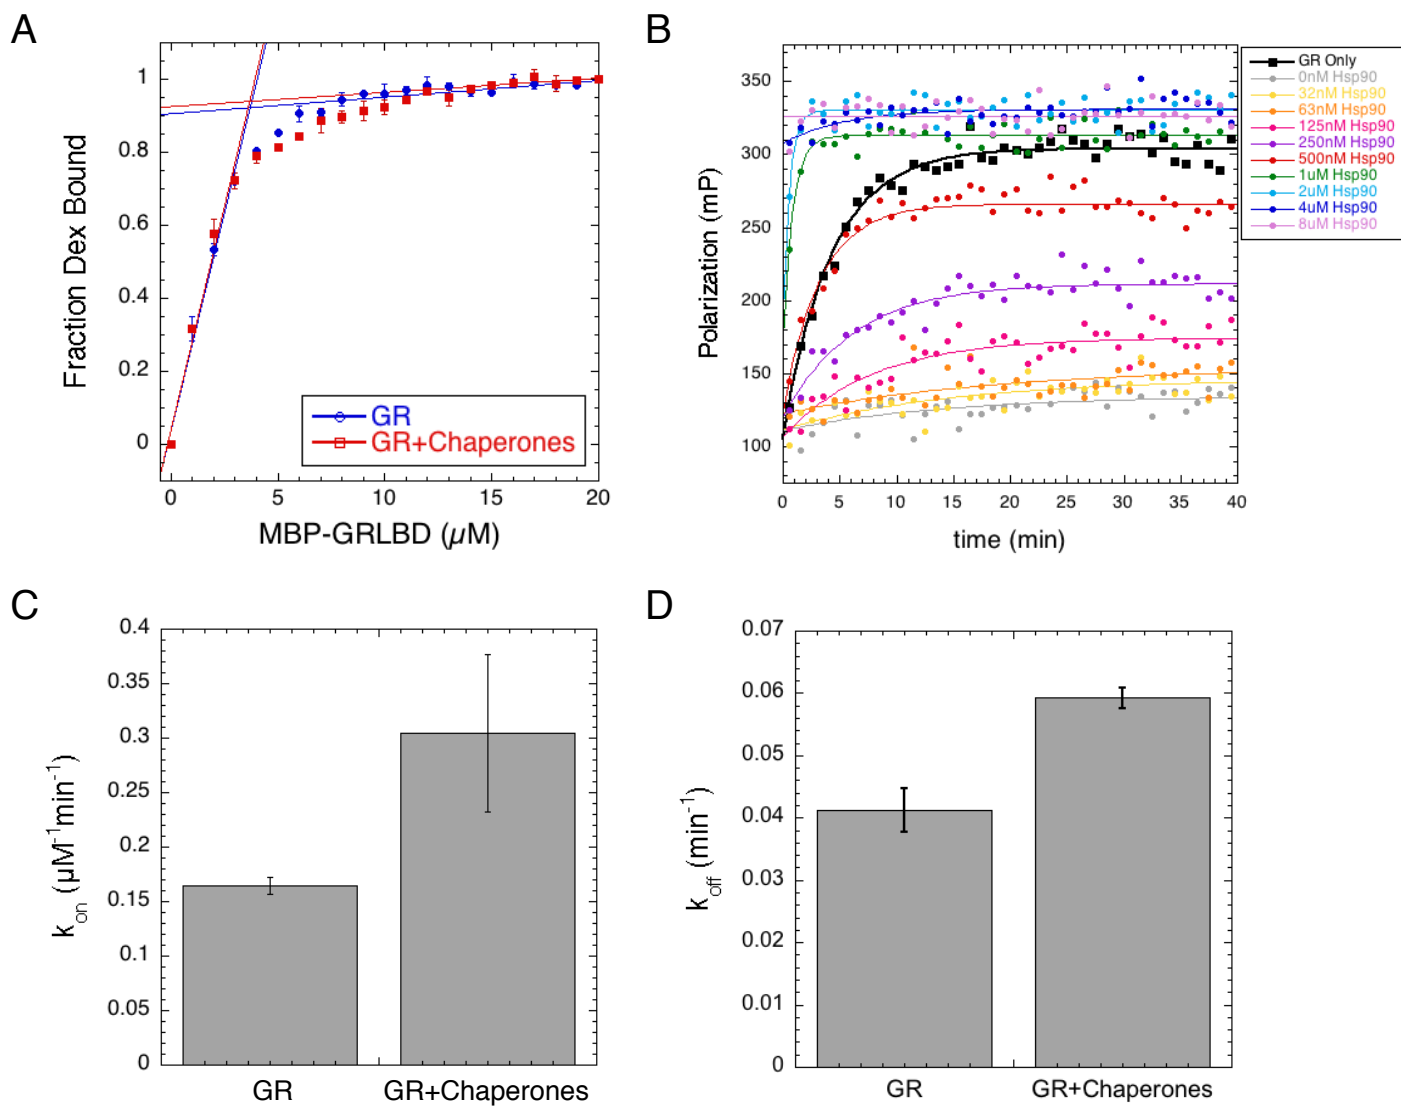



Figure S5

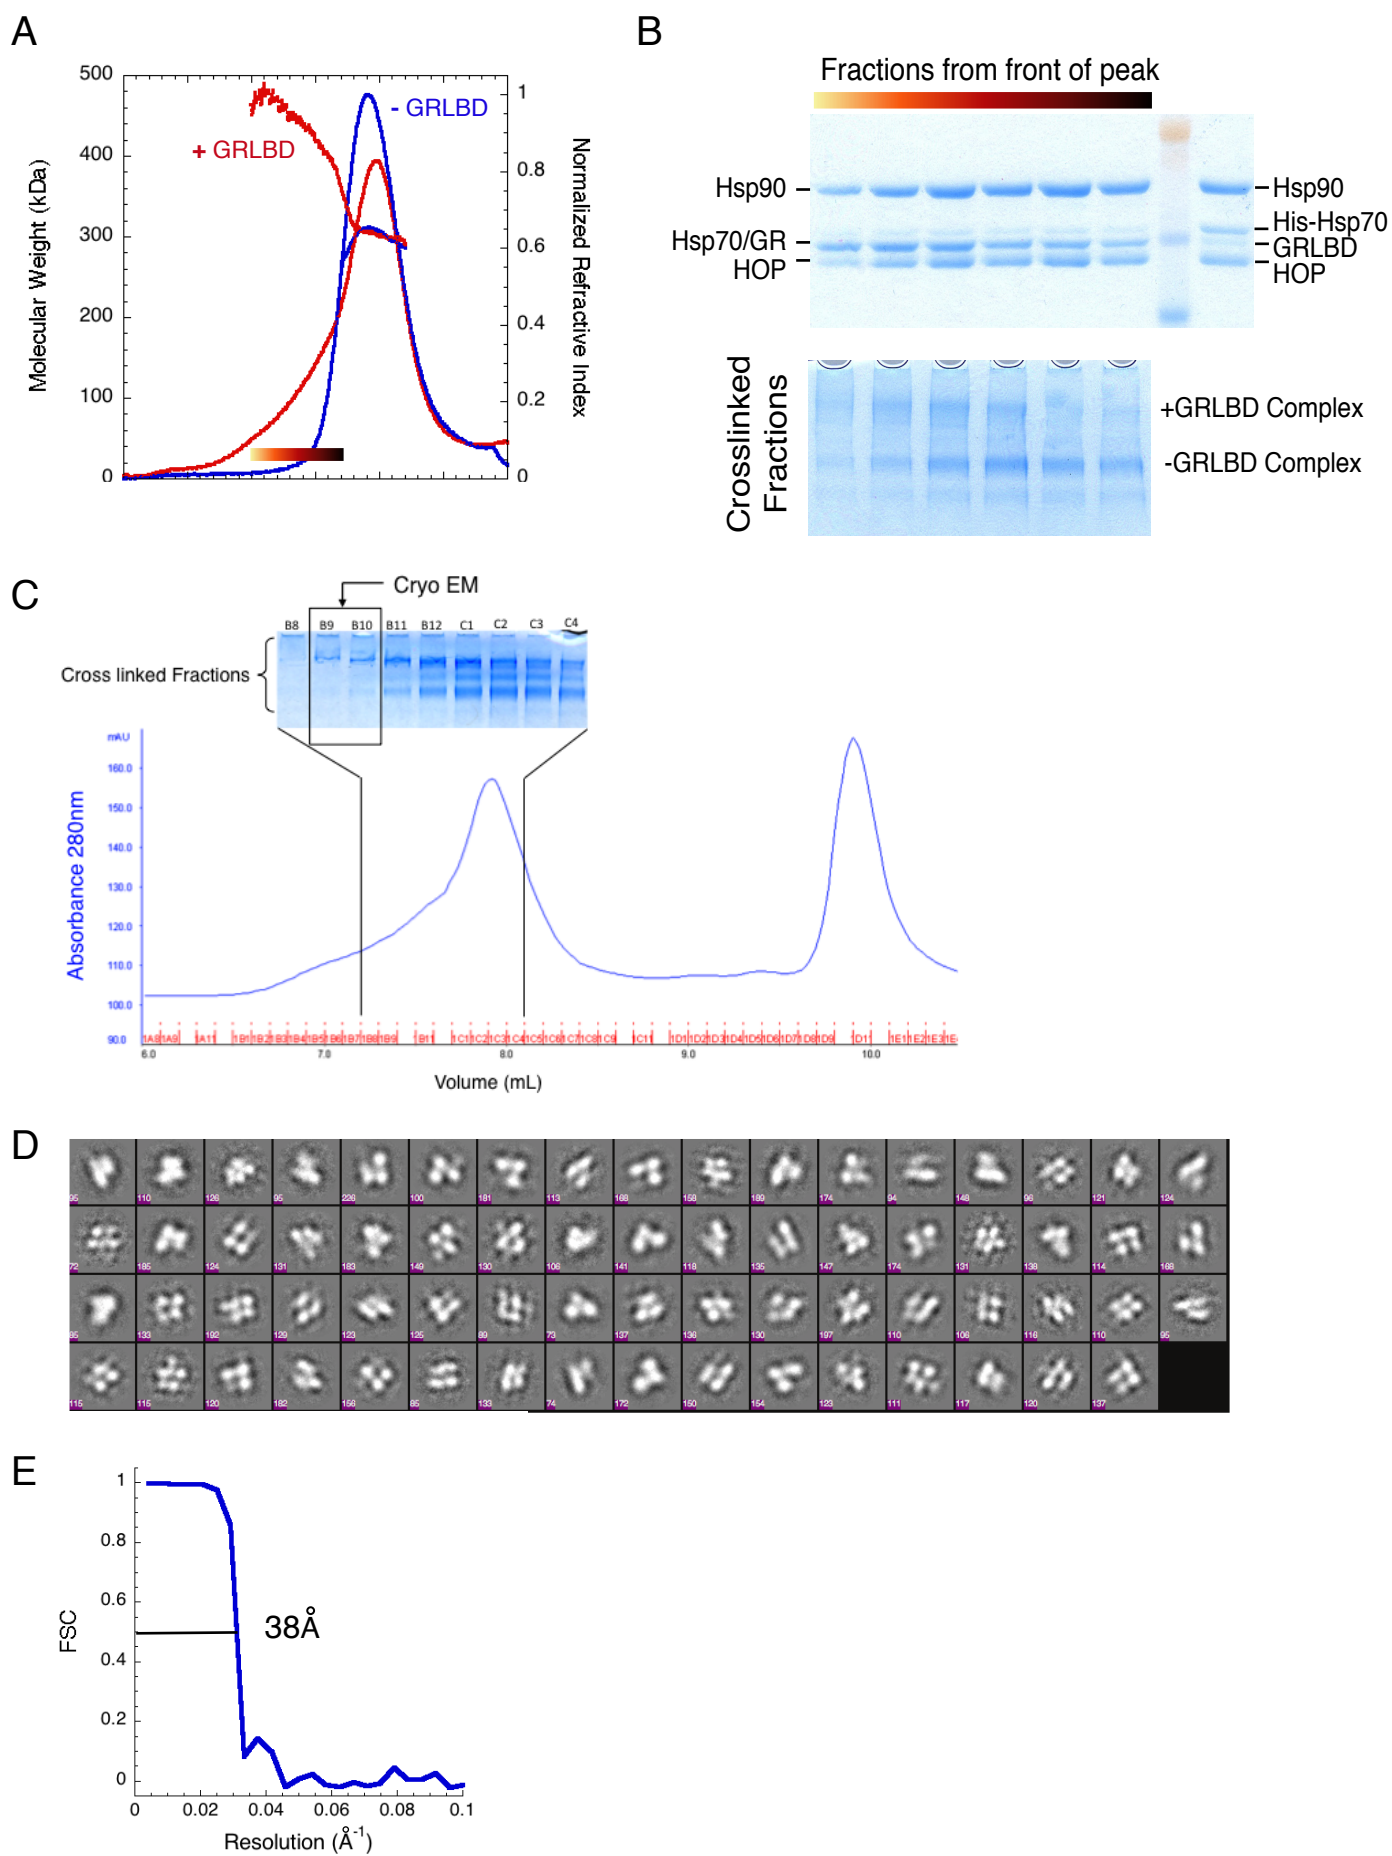

Figure S6

A

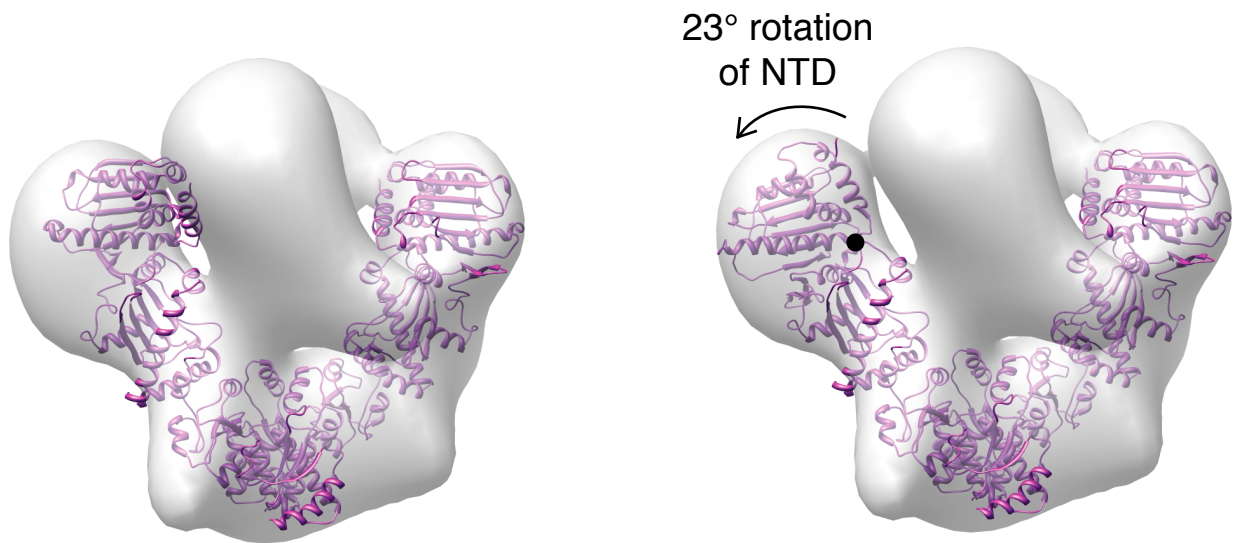

B

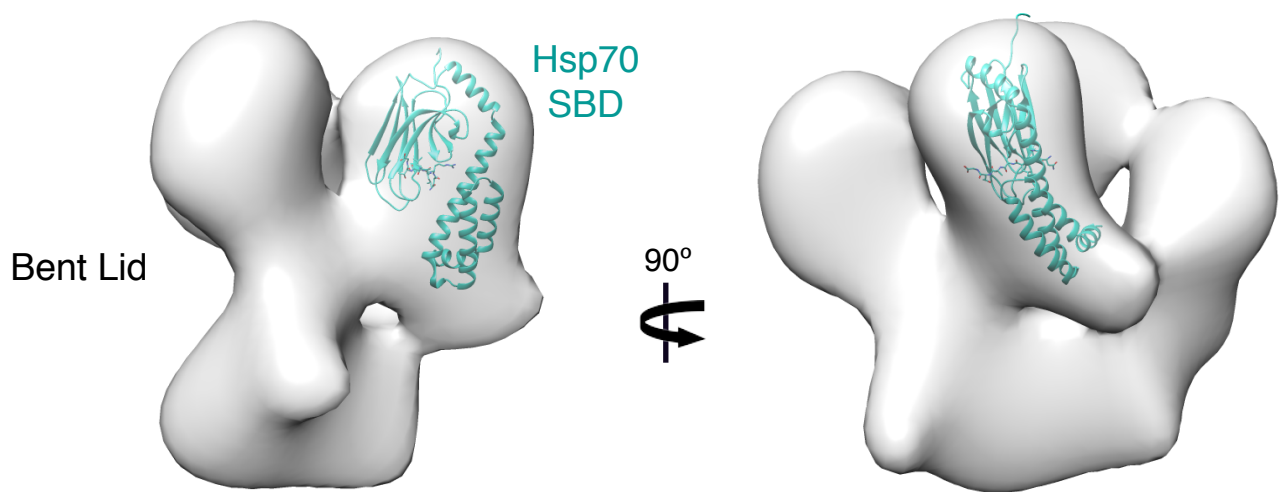

C

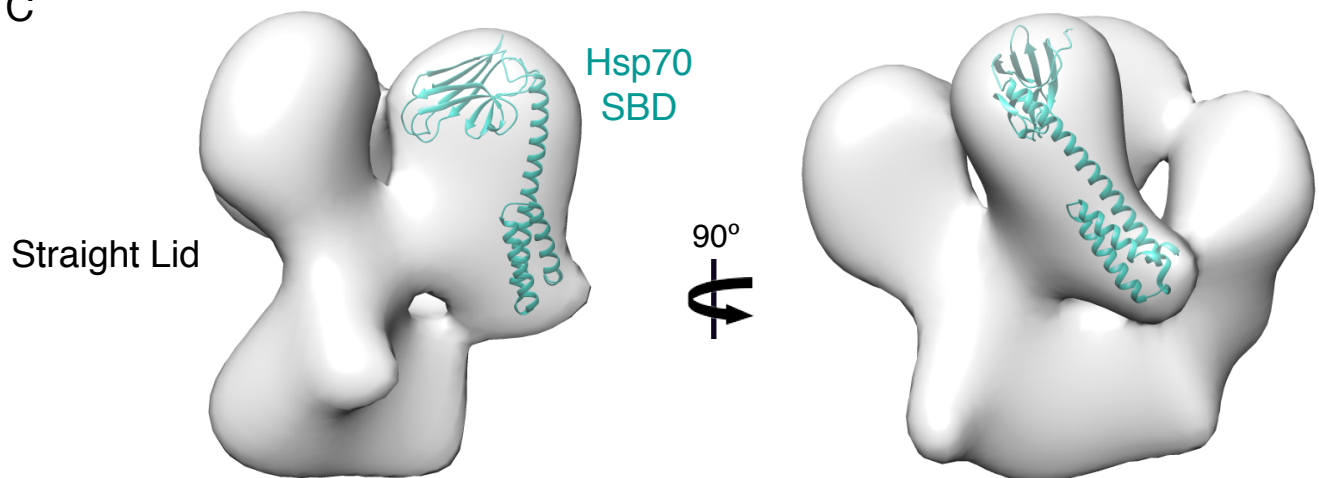

Figure S7

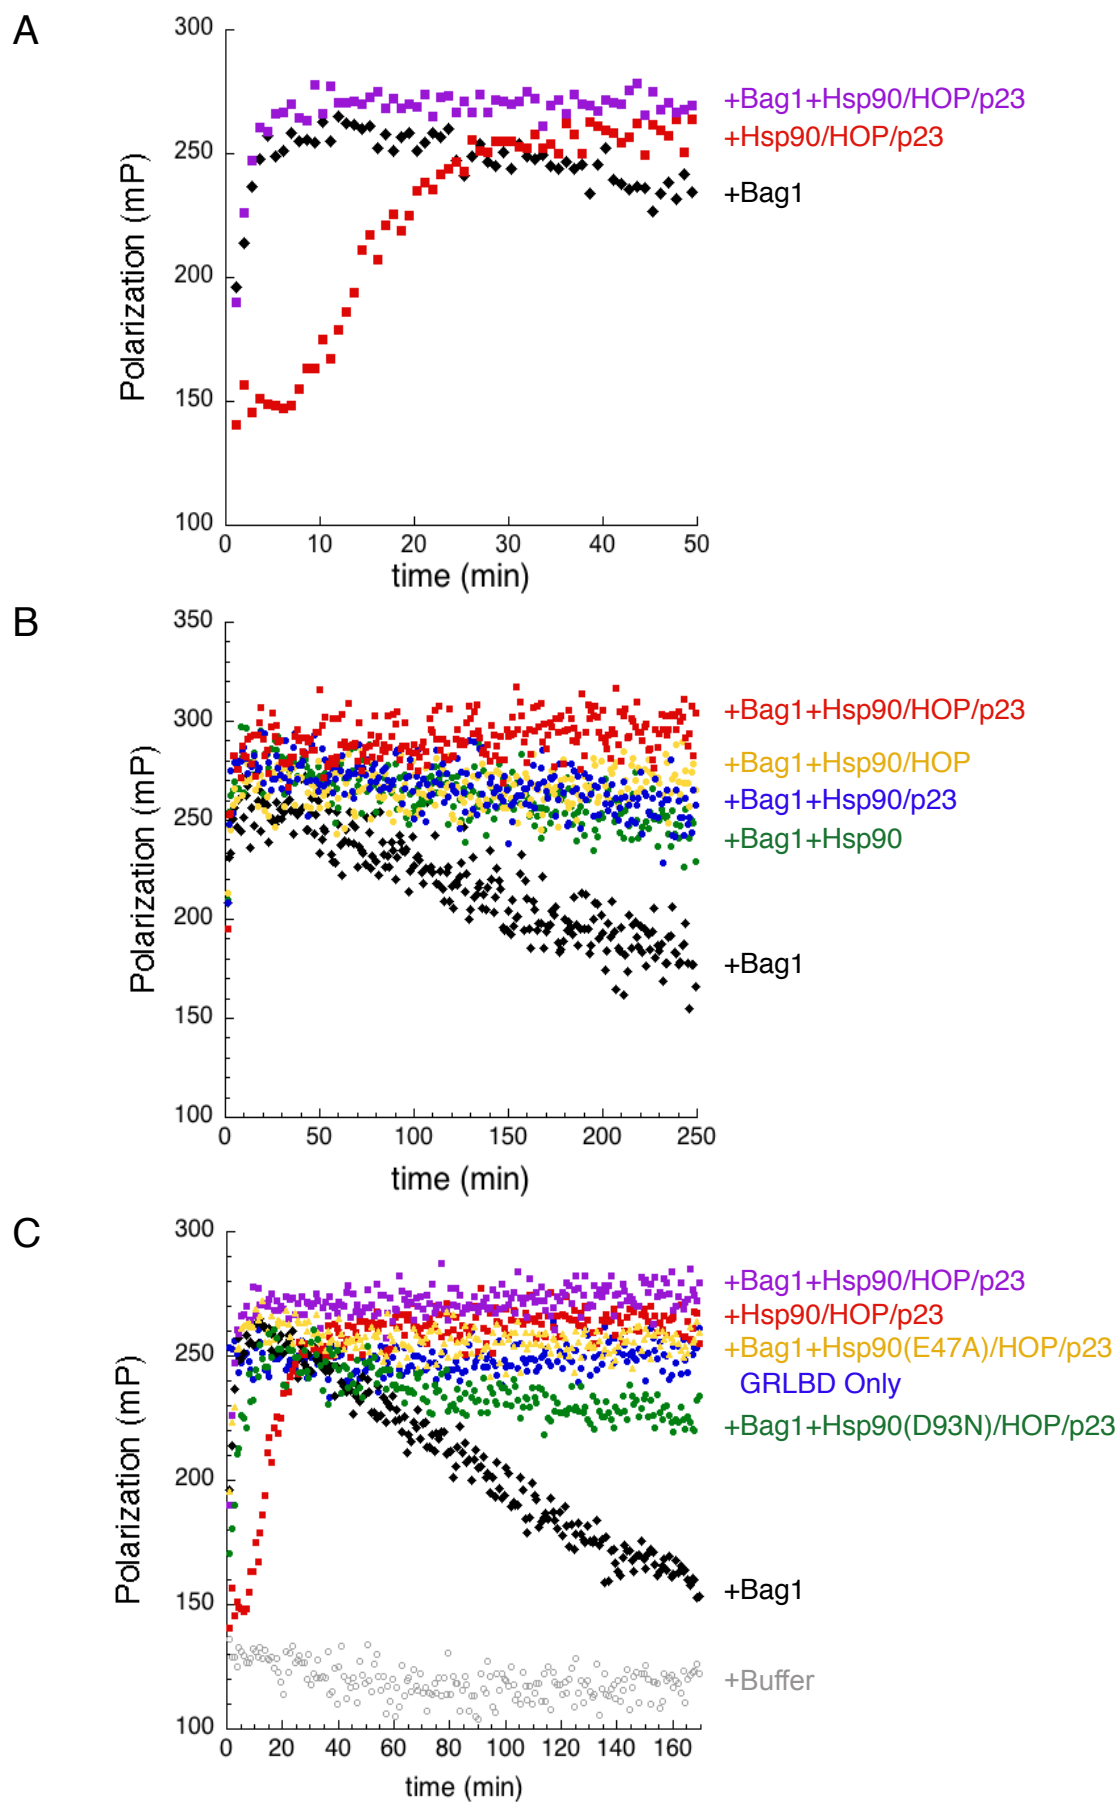

Supplement: NIHMS600453-supplement-02.pdf [file NIHMS600453-supplement-02.pdf]
